# Supplementary material
Source: publisher site journal article supplement (https://www.dovepress.com/article/438308)
Supplement: Supplementary file 1 [file get_supplementary_file.php]

## CCK-8

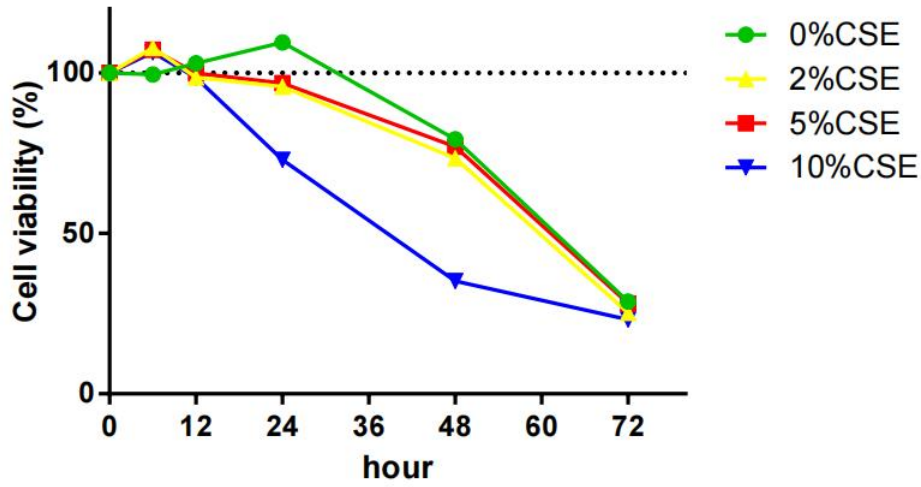

Supplementary Figure 1: Determination of Cell Viability

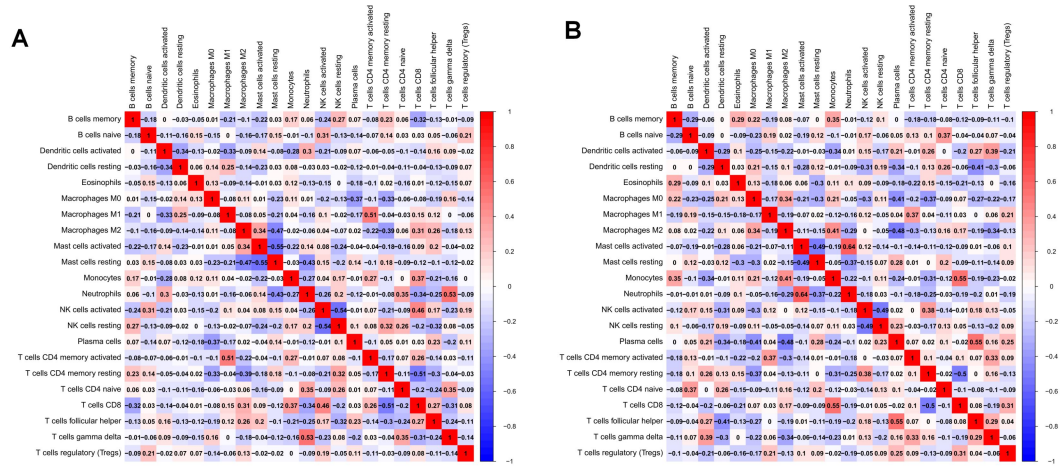

Supplementary Figure 2. Correlation between immune cells in GSE20257(A) and GSE10006(B).

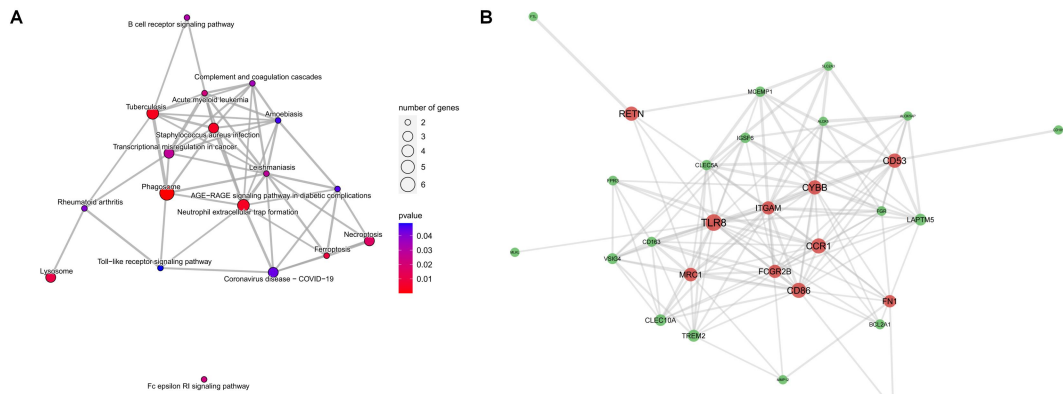

**Supplementary Figure 3.** Kyoto encyclopedia of genes and genomes and Protein-Protein Interaction Networks. (A) Network diagram of KEGG enrichment analyses. (B) PPI network. Red represents hub genes.

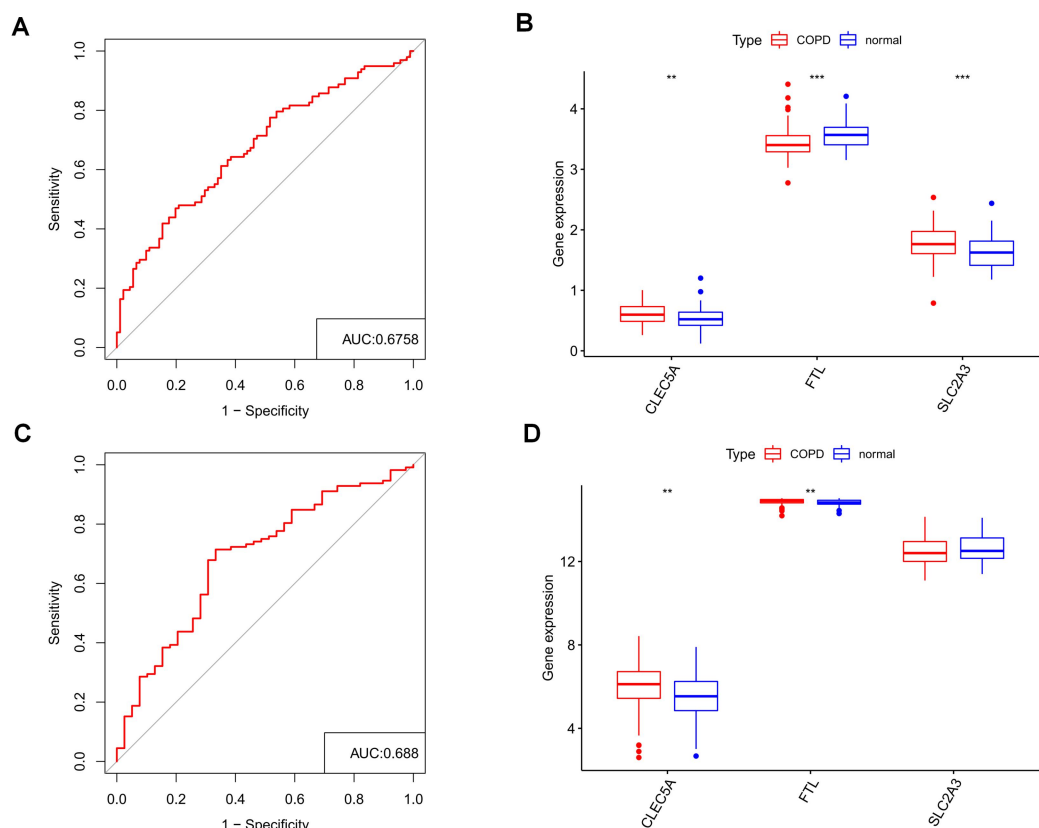

**Supplementary Figure 4.** Identification of 3 gene signatures in lung tissue. auc for predicted outcomes in GSE57148 (A) and GSE76925 (B). expression of CLEC5A, FTL and SLC2A3 in COPD patients and healthy controls in GSE57148 (C) and GSE76925 (D). ns, not significant; \*  $P < 0.05$ , \*\*  $P < 0.01$ , \*\*\*  $p < 0.001$ .

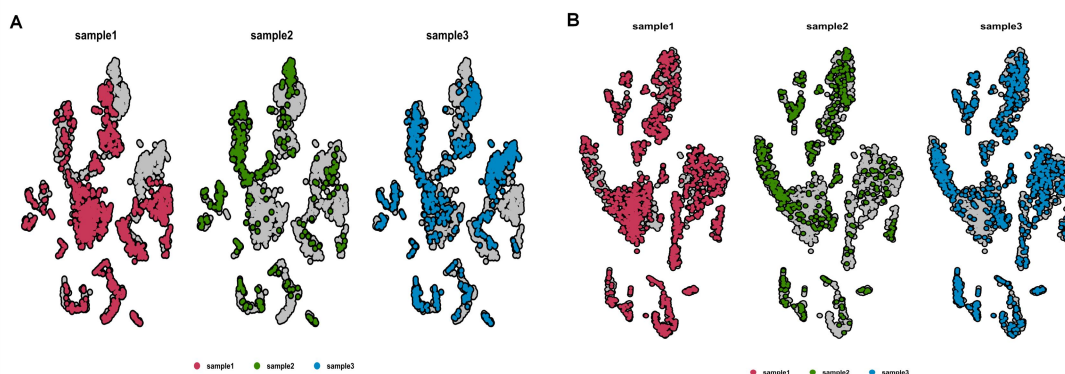

**Supplementary Figure 5.** tSNE plots before (A) and after (B) correction of the "harmony" R package batch.

**Supplementary Table 1.** GO enrichment analysis of 41 candidate genes.

| ONTO<br>LOGY | ID         | Description                                                        | GeneRatio | BgRatio   | pvalue   | p.adju<br>st    | qvalu<br>e      | geneID                                       | Coun<br>t |
|--------------|------------|--------------------------------------------------------------------|-----------|-----------|----------|-----------------|-----------------|----------------------------------------------|-----------|
| BP           | GO:0001819 | positive regulation of cytokine production                         | 8/37      | 475/18800 | 3.17E-06 | 0.0015<br>24512 | 0.0009<br>85909 | CLEC5A/CYBB/MMP12/CD86/TREM2/TLR8/LAPTM5/FGR | 8         |
| BP           | GO:0050866 | negative regulation of cell activation                             | 6/37      | 216/18800 | 3.71E-06 | 0.0015<br>24512 | 0.0009<br>85909 | CD86/TREM2/LAPTM5/FGR/VSIG4/FCGR2B           | 6         |
| BP           | GO:0002697 | regulation of immune effector process                              | 7/37      | 353/18800 | 4.92E-06 | 0.0015<br>24512 | 0.0009<br>85909 | CD86/TREM2/ITGAM/LAPTM5/FGR/VSIG4/FCGR2B     | 7         |
| BP           | GO:0045088 | regulation of innate immune response                               | 6/37      | 231/18800 | 5.45E-06 | 0.0015<br>24512 | 0.0009<br>85909 | MMP12/TREM2/TLR8/FGR/VSIG4/FCGR2B            | 6         |
| BP           | GO:0002274 | myeloid leukocyte activation                                       | 6/37      | 232/18800 | 5.59E-06 | 0.0015<br>24512 | 0.0009<br>85909 | TREM2/ITGAM/FN1/FGR/VSIG4/FCGR2B             | 6         |
| BP           | GO:0031348 | negative regulation of defense response                            | 6/37      | 268/18800 | 1.27E-05 | 0.0023<br>83418 | 0.0015<br>41368 | ALOX5/MMP12/TREM2/FGR/VSIG4/FCGR2B           | 6         |
| BP           | GO:0051250 | negative regulation of lymphocyte activation                       | 5/37      | 161/18800 | 1.51E-05 | 0.0023<br>83418 | 0.0015<br>41368 | CD86/LAPTM5/FGR/VSIG4/FCGR2B                 | 5         |
| BP           | GO:0002683 | negative regulation of immune system process                       | 7/37      | 425/18800 | 1.64E-05 | 0.0023<br>83418 | 0.0015<br>41368 | MMP12/CD86/TREM2/LAPTM5/FGR/VSIG4/FCGR2B     | 7         |
| BP           | GO:0014068 | positive regulation of phosphatidylinositol 3-kinase signaling     | 4/37      | 79/18800  | 1.72E-05 | 0.0023<br>83418 | 0.0015<br>41368 | TREM2/FN1/FGR/PIK3AP1                        | 4         |
| BP           | GO:0032102 | negative regulation of response to external stimulus               | 7/37      | 429/18800 | 1.75E-05 | 0.0023<br>83418 | 0.0015<br>41368 | ALOX5/MMP12/TREM2/NRP1/FGR/VSIG4/FCGR2B      | 7         |
| BP           | GO:0048015 | phosphatidylinositol-mediated signaling                            | 5/37      | 177/18800 | 2.39E-05 | 0.0027<br>88243 | 0.0018<br>0317  | CA8/TREM2/FN1/FGR/PIK3AP1                    | 5         |
| BP           | GO:0050777 | negative regulation of immune response                             | 5/37      | 179/18800 | 2.52E-05 | 0.0027<br>88243 | 0.0018<br>0317  | MMP12/TREM2/FGR/VSIG4/FCGR2B                 | 5         |
| BP           | GO:0048017 | inositol lipid-mediated signaling                                  | 5/37      | 181/18800 | 2.66E-05 | 0.0027<br>88243 | 0.0018<br>0317  | CA8/TREM2/FN1/FGR/PIK3AP1                    | 5         |
| BP           | GO:0002862 | negative regulation of inflammatory response to antigenic stimulus | 3/37      | 31/18800  | 3.04E-05 | 0.0029<br>58606 | 0.0019<br>13344 | TREM2/FGR/FCGR2B                             | 3         |
| BP           | GO:0002695 | negative regulation of leukocyte                                   | 5/37      | 193/18800 | 3.61E-05 | 0.0031<br>40918 | 0.0020<br>31247 | CD86/LAPTM5/FGR/VSIG4/FCGR2B                 | 5         |

|    |         |                                                           |      |           |           |        |        |       |       |       |                                        |   |
|----|---------|-----------------------------------------------------------|------|-----------|-----------|--------|--------|-------|-------|-------|----------------------------------------|---|
|    |         | activation                                                |      |           |           |        |        |       |       |       |                                        |   |
|    |         | immune                                                    |      |           |           |        |        |       |       |       | TREM2/TLR8/LAPTM                       |   |
| BP | GO:0002 | response-regulating signaling pathway                     | 7/37 | 482/18800 | 3.68E-05  | 0.0031 | 0.0020 | 40918 | 31247 |       | 5/FPR3/FGR/PIK3AP1/FCGR2B              | 7 |
| BP | GO:0042 | macrophage activation                                     | 4/37 | 106/18800 | 5.46E-05  | 0.0041 | 0.0026 | 54008 | 86417 |       | TREM2/ITGAM/VSIG4/FCGR2B               | 4 |
| BP | GO:0007 | integrin-mediated signaling pathway                       | 4/37 | 107/18800 | 5.67E-05  | 0.0041 | 0.0026 | 54008 | 86417 |       | ITGAM/FN1/NRP1/FGFR                    | 4 |
| BP | GO:0002 | regulation of response to biotic stimulus                 | 6/37 | 351/18800 | 5.79E-05  | 0.0041 | 0.0026 | 54008 | 86417 |       | MMP12/TREM2/TLR8/FGFR/VSIG4/FCGR2B     | 6 |
| BP | GO:0045 | positive regulation of axon extension                     | 3/37 | 39/18800  | 6.11E-05  | 0.0041 | 0.0026 | 58771 | 89497 |       | TRPV2/FN1/NRP1                         | 3 |
| BP | GO:0014 | regulation of phosphatidylinositol 3-kinase signaling     | 4/37 | 111/18800 | 6.54E-05  | 0.0041 | 0.0026 | 58771 | 89497 |       | TREM2/FN1/FGR/PIK3AP1                  | 4 |
| BP | GO:0001 | negative regulation of cytokine production                | 6/37 | 363/18800 | 6.97E-05  | 0.0041 | 0.0026 | 58771 | 89497 |       | TREM2/TLR8/LAPTM/FGFR/VSIG4/FCGR2B     | 6 |
| BP | GO:0002 | acute inflammatory response                               | 4/37 | 113/18800 | 7.01E-05  | 0.0041 | 0.0026 | 58771 | 89497 |       | ALOX5AP/FN1/CD163/FCGR2B               | 4 |
| BP | GO:0002 | regulation of inflammatory response to antigenic stimulus | 3/37 | 45/18800  | 9.41E-05  | 0.0051 | 0.0033 | 28686 | 16746 |       | TREM2/FGR/FCGR2B                       | 3 |
| BP | GO:0002 | regulation of humoral immune response                     | 3/37 | 45/18800  | 9.41E-05  | 0.0051 | 0.0033 | 28686 | 16746 |       | TREM2/VSIG4/FCGR2B                     | 3 |
| BP | GO:0002 | activation of immune response                             | 6/37 | 386/18800 | 9.78E-05  | 0.0051 | 0.0033 | 28686 | 16746 |       | TREM2/LAPTM5/FPR3/FGR/VSIG4/FCGR2B     | 6 |
| BP | GO:0050 | negative regulation of T cell activation                  | 4/37 | 125/18800 | 0.0001037 | 0.0052 | 0.0033 | 89    | 43266 | 90845 | CD86/LAPTM5/VSIG4/FCGR2B               | 4 |
| BP | GO:0050 | regulation of inflammatory response                       | 6/37 | 394/18800 | 0.0001094 | 0.0053 | 0.0034 | 01    | 29387 | 4654  | ALOX5/ALOX5AP/TREM2/FGR/PIK3AP1/FCGR2B | 6 |
| BP | GO:0002 | positive regulation of immune effector process            | 5/37 | 248/18800 | 0.0001184 | 0.0055 | 0.0035 | 57    | 22743 | 71584 | CD86/TREM2/ITGAM/LAPTM5/FGR            | 5 |
| BP | GO:0043 | regulation of leukocyte degranulation                     | 3/37 | 49/18800  | 0.0001214 | 0.0055 | 0.0035 | 68    | 22743 | 71584 | ITGAM/FGR/FCGR2B                       | 3 |
| BP | GO:0048 | autophagic cell death                                     | 2/37 | 10/18800  | 0.0001679 | 0.0071 | 0.0046 | 23    | 69216 | 36366 | TREM2/LAPTM5                           | 2 |

|    |         |                                                            |      |           |           |        |        |                                    |   |
|----|---------|------------------------------------------------------------|------|-----------|-----------|--------|--------|------------------------------------|---|
| BP | GO:1904 | response to amyloid-beta                                   | 3/37 | 55/18800  | 0.0001715 | 0.0071 | 0.0046 | MMP12/TREM2/FCGR2B                 | 3 |
| BP | GO:0014 | phosphatidylinositol 3-kinase signaling                    | 4/37 | 144/18800 | 0.0001791 | 0.0071 | 0.0046 | TREM2/FN1/FGR/PIK3AP1              | 4 |
| BP | GO:1903 | negative regulation of leukocyte cell-cell adhesion        | 4/37 | 144/18800 | 0.0001791 | 0.0071 | 0.0046 | CD86/LAPTM5/VSIG4/FCGR2B           | 4 |
| BP | GO:0046 | viral entry into host cell                                 | 4/37 | 146/18800 | 0.0001888 | 0.0071 | 0.0046 | MRC1/CLEC5A/CD86/NRP1              | 4 |
| BP | GO:0001 | positive regulation of cytokine-mediated signaling pathway | 3/37 | 57/18800  | 0.0001908 | 0.0071 | 0.0046 | MMP12/TREM2/LAPTM5                 | 3 |
| BP | GO:0032 | positive regulation of response to external stimulus       | 6/37 | 442/18800 | 0.0002045 | 0.0071 | 0.0046 | ALOX5AP/MMP12/TREM2/TLR8/NRP1/CCR1 | 6 |
| BP | GO:0019 | lipoygenase pathway                                        | 2/37 | 11/18800  | 0.0002049 | 0.0071 | 0.0046 | ALOX5/ALOX5AP                      | 2 |
| BP | GO:0098 | synapse pruning                                            | 2/37 | 11/18800  | 0.0002049 | 0.0071 | 0.0046 | TREM2/ITGAM                        | 2 |
| BP | GO:0002 | regulation of myeloid leukocyte mediated immunity          | 3/37 | 59/18800  | 0.0002114 | 0.0072 | 0.0046 | ITGAM/FGR/FCGR2B                   | 3 |
| BP | GO:0044 | entry into host                                            | 4/37 | 153/18800 | 0.0002259 | 0.0073 | 0.0047 | MRC1/CLEC5A/CD86/NRP1              | 4 |
| BP | GO:0002 | leukocyte activation involved in immune response           | 5/37 | 285/18800 | 0.0002264 | 0.0073 | 0.0047 | CD86/TREM2/ITGAM/FGR/FCGR2B        | 5 |
| BP | GO:0044 | biological process involved in symbiotic interaction       | 5/37 | 286/18800 | 0.0002301 | 0.0073 | 0.0047 | MRC1/CLEC5A/CD86/FN1/NRP1          | 5 |
| BP | GO:0002 | cell activation involved in immune response                | 5/37 | 289/18800 | 0.0002415 | 0.0074 | 0.0048 | CD86/TREM2/ITGAM/FGR/FCGR2B        | 5 |
| BP | GO:0043 | regulation of macrophage activation                        | 3/37 | 62/18800  | 0.0002449 | 0.0074 | 0.0048 | TREM2/VSIG4/FCGR2B                 | 3 |
| BP | GO:0032 | interleukin-2 production                                   | 3/37 | 63/18800  | 0.0002568 | 0.0074 | 0.0048 | CD86/LAPTM5/VSIG4                  | 3 |
| BP | GO:0032 | regulation of interleukin-2 production                     | 3/37 | 63/18800  | 0.0002568 | 0.0074 | 0.0048 | CD86/LAPTM5/VSIG4                  | 3 |
| BP | GO:0060 | positive regulation of response to cytokine stimulus       | 3/37 | 64/18800  | 0.0002691 | 0.0076 | 0.0049 | MMP12/TREM2/LAPTM5                 | 3 |

|    |         |                                                                         |      |           |           |        |        |                            |   |
|----|---------|-------------------------------------------------------------------------|------|-----------|-----------|--------|--------|----------------------------|---|
| BP | GO:1901 | positive regulation of<br>NIK/NF-kappaB<br>signaling                    | 3/37 | 67/18800  | 0.0003082 | 0.0084 | 0.0054 | CD86/TREM2/LAPTM           | 3 |
|    | 224     |                                                                         |      |           | 3         | 48572  | 63731  | 5                          |   |
| BP | GO:0007 | negative regulation<br>of cell adhesion                                 | 5/37 | 305/18800 | 0.0003096 | 0.0084 | 0.0054 | MMP12/CD86/LAPTM           | 5 |
|    | 162     |                                                                         |      |           | 98        | 48572  | 63731  | 5/VSIG4/FCGR2B             |   |
| BP | GO:0070 | protein<br>homotrimerization                                            | 2/37 | 15/18800  | 0.0003893 | 0.0101 | 0.0065 | ALOX5AP/MLKL               | 2 |
|    | 207     |                                                                         |      |           | 98        | 27459  | 49476  |                            |   |
| BP | GO:1902 | regulation of<br>neutrophil activation                                  | 2/37 | 15/18800  | 0.0003893 | 0.0101 | 0.0065 | ITGAM/FCGR2B               | 2 |
|    | 563     |                                                                         |      |           | 98        | 27459  | 49476  |                            |   |
| BP | GO:0052 | movement in host<br>environment                                         | 4/37 | 177/18800 | 0.0003935 | 0.0101 | 0.0065 | MRC1/CLEC5A/CD86/<br>NRP1  | 4 |
|    | 126     |                                                                         |      |           | 16        | 27459  | 49476  |                            |   |
| BP | GO:0002 | inflammatory<br>response to antigenic<br>stimulus                       | 3/37 | 75/18800  | 0.0004297 | 0.0105 | 0.0067 | TREM2/FGR/FCGR2B           | 3 |
|    | 437     |                                                                         |      |           | 92        | 08667  | 96004  |                            |   |
| BP | GO:0050 | negative regulation<br>of inflammatory<br>response                      | 4/37 | 182/18800 | 0.0004372 | 0.0105 | 0.0067 | ALOX5/TREM2/FGR/<br>FCGR2B | 4 |
|    | 728     |                                                                         |      |           | 41        | 08667  | 96004  |                            |   |
| BP | GO:0002 | negative regulation<br>of humoral immune<br>response                    | 2/37 | 16/18800  | 0.0004444 | 0.0105 | 0.0067 | VSIG4/FCGR2B               | 2 |
|    | 921     |                                                                         |      |           | 74        | 08667  | 96004  |                            |   |
| BP | GO:0023 | CD40 signaling<br>pathway                                               | 2/37 | 16/18800  | 0.0004444 | 0.0105 | 0.0067 | CD86/TREM2                 | 2 |
|    | 035     |                                                                         |      |           | 74        | 08667  | 96004  |                            |   |
| BP | GO:0043 | leukocyte<br>degranulation                                              | 3/37 | 76/18800  | 0.0004468 | 0.0105 | 0.0067 | ITGAM/FGR/FCGR2B           | 3 |
|    | 299     |                                                                         |      |           | 49        | 08667  | 96004  |                            |   |
| BP | GO:0050 | positive regulation of<br>axonogenesis                                  | 3/37 | 77/18800  | 0.0004643 | 0.0107 | 0.0069 | TRPV2/FN1/NRP1             | 3 |
|    | 772     |                                                                         |      |           | 36        | 3483   | 42265  |                            |   |
| BP | GO:0034 | toll-like receptor 2<br>signaling pathway                               | 2/37 | 17/18800  | 0.0005031 | 0.0112 | 0.0072 | TREM2/PIK3AP1              | 2 |
|    | 134     |                                                                         |      |           | 13        | 49947  | 75394  |                            |   |
| BP | GO:0070 | protein trimerization                                                   | 2/37 | 17/18800  | 0.0005031 | 0.0112 | 0.0072 | ALOX5AP/MLKL               | 2 |
|    | 206     |                                                                         |      |           | 13        | 49947  | 75394  |                            |   |
| BP | GO:0051 | biological process<br>involved in<br>interaction with host              | 4/37 | 191/18800 | 0.0005245 | 0.0115 | 0.0074 | MRC1/CLEC5A/CD86/<br>NRP1  | 4 |
|    | 701     |                                                                         |      |           | 36        | 3979   | 62837  |                            |   |
| BP | GO:1903 | regulation of<br>leukocyte cell-cell<br>adhesion                        | 5/37 | 344/18800 | 0.0005367 | 0.0116 | 0.0075 | ALOX5/CD86/LAPTM           | 5 |
|    | 037     |                                                                         |      |           | 81        | 21726  | 15825  | 5/VSIG4/FCGR2B             |   |
| BP | GO:0002 | humoral immune<br>response mediated by<br>circulating<br>immunoglobulin | 2/37 | 18/18800  | 0.0005653 | 0.0120 | 0.0077 | TREM2/FCGR2B               | 2 |
|    | 923     |                                                                         |      |           | 01        | 47984  | 91489  |                            |   |
| BP | GO:0050 | negative regulation<br>of lymphocyte<br>proliferation                   | 3/37 | 84/18800  | 0.0005991 | 0.0125 | 0.0081 | CD86/VSIG4/FCGR2B          | 3 |
|    | 672     |                                                                         |      |           | 39        | 72693  | 3082   |                            |   |

|    |         |                                                                                |      |           |                 |                 |                 |                                    |   |
|----|---------|--------------------------------------------------------------------------------|------|-----------|-----------------|-----------------|-----------------|------------------------------------|---|
| BP | GO:0022 | negative regulation<br>of cell-cell adhesion                                   | 4/37 | 199/18800 | 0.0006119<br>86 | 0.0126<br>26552 | 0.0081<br>65651 | CD86/LAPTM5/VSIG4<br>/FCGR2B       | 4 |
| BP | GO:0032 | negative regulation<br>of mononuclear cell<br>proliferation                    | 3/37 | 85/18800  | 0.0006202<br>19 | 0.0126<br>26552 | 0.0081<br>65651 | CD86/VSIG4/FCGR2B                  | 3 |
| BP | GO:0043 | negative regulation<br>of macrophage<br>activation                             | 2/37 | 19/18800  | 0.0006310<br>25 | 0.0126<br>5761  | 0.0081<br>85737 | VSIG4/FCGR2B                       | 2 |
| BP | GO:0031 | cell-substrate<br>adhesion                                                     | 5/37 | 364/18800 | 0.0006932<br>19 | 0.0134<br>53071 | 0.0087<br>00165 | PARVB/MMP12/ITGA<br>M/FN1/NRP1     | 5 |
| BP | GO:0002 | regulation of antigen<br>processing and<br>presentation                        | 2/37 | 20/18800  | 0.0007002<br>7  | 0.0134<br>53071 | 0.0087<br>00165 | TREM2/FCGR2B                       | 2 |
| BP | GO:0097 | dendritic spine<br>maintenance                                                 | 2/37 | 20/18800  | 0.0007002<br>7  | 0.0134<br>53071 | 0.0087<br>00165 | TREM2/FCGR2B                       | 2 |
| BP | GO:0070 | negative regulation<br>of leukocyte<br>proliferation                           | 3/37 | 91/18800  | 0.0007566<br>94 | 0.0138<br>73742 | 0.0089<br>72214 | CD86/VSIG4/FCGR2B                  | 3 |
| BP | GO:0019 | leukotriene<br>biosynthetic process                                            | 2/37 | 21/18800  | 0.0007730<br>24 | 0.0138<br>73742 | 0.0089<br>72214 | ALOX5/ALOX5AP                      | 2 |
| BP | GO:0030 | regulation of<br>complement<br>activation                                      | 2/37 | 21/18800  | 0.0007730<br>24 | 0.0138<br>73742 | 0.0089<br>72214 | TREM2/VSIG4                        | 2 |
| BP | GO:0032 | positive regulation of<br>interferon-alpha<br>production                       | 2/37 | 21/18800  | 0.0007730<br>24 | 0.0138<br>73742 | 0.0089<br>72214 | MMP12/TLR8                         | 2 |
| BP | GO:0150 | cell junction<br>disassembly                                                   | 2/37 | 21/18800  | 0.0007730<br>24 | 0.0138<br>73742 | 0.0089<br>72214 | TREM2/ITGAM                        | 2 |
| BP | GO:0002 | myeloid cell<br>activation involved<br>in immune response                      | 3/37 | 93/18800  | 0.0008060<br>92 | 0.0140<br>96277 | 0.0091<br>16129 | TREM2/ITGAM/FGR                    | 3 |
| BP | GO:0030 | regulation of axon<br>extension                                                | 3/37 | 93/18800  | 0.0008060<br>92 | 0.0140<br>96277 | 0.0091<br>16129 | TRPV2/FN1/NRP1                     | 3 |
| BP | GO:0007 | leukocyte cell-cell<br>adhesion                                                | 5/37 | 381/18800 | 0.0008512<br>09 | 0.0146<br>9683  | 0.0095<br>04509 | ALOX5/CD86/LAPTM<br>5/VSIG4/FCGR2B | 5 |
| BP | GO:0002 | production of<br>molecular mediator<br>involved in<br>inflammatory<br>response | 3/37 | 97/18800  | 0.0009109<br>44 | 0.0155<br>31593 | 0.0100<br>44355 | ALOX5/ALOX5AP/TR<br>EM2            | 3 |
| BP | GO:0050 | regulation of<br>phagocytosis                                                  | 3/37 | 99/18800  | 0.0009664<br>61 | 0.0162<br>74732 | 0.0105<br>24946 | TREM2/FGR/FCGR2B                   | 3 |
| BP | GO:0002 | positive regulation of<br>humoral immune                                       | 2/37 | 24/18800  | 0.0010122<br>04 | 0.0164<br>36268 | 0.0106<br>29413 | TREM2/FCGR2B                       | 2 |

|    |         |                                                                      |      |           |           |        |        |  |                   |   |
|----|---------|----------------------------------------------------------------------|------|-----------|-----------|--------|--------|--|-------------------|---|
|    |         | response                                                             |      |           |           |        |        |  |                   |   |
| BP | GO:0045 | positive regulation of osteoclast differentiation                    | 2/37 | 24/18800  | 0.0010122 | 0.0164 | 0.0106 |  | TREM2/CCR1        | 2 |
|    | 672     |                                                                      |      |           | 04        | 36268  | 29413  |  |                   |   |
| BP | GO:0060 | positive regulation of syncytium formation by plasma membrane fusion | 2/37 | 24/18800  | 0.0010122 | 0.0164 | 0.0106 |  | TREM2/CD53        | 2 |
|    | 143     |                                                                      |      |           | 04        | 36268  | 29413  |  |                   |   |
| BP | GO:0071 | cellular response to molecule of bacterial origin                    | 4/37 | 229/18800 | 0.0010331 | 0.0165 | 0.0107 |  | MRC1/CD86/TREM2/F | 4 |
|    | 219     |                                                                      |      |           | 4         | 78855  | 21624  |  | CGR2B             |   |
| BP | GO:0006 | substrate-dependent cell migration                                   | 2/37 | 25/18800  | 0.0010988 | 0.0172 | 0.0111 |  | FN1/NRP1          | 2 |
|    | 929     |                                                                      |      |           | 6         | 28101  | 41494  |  |                   |   |
| BP | GO:0043 | positive regulation of leukocyte degranulation                       | 2/37 | 25/18800  | 0.0010988 | 0.0172 | 0.0111 |  | ITGAM/FGR         | 2 |
|    | 302     |                                                                      |      |           | 6         | 28101  | 41494  |  |                   |   |
| BP | GO:0002 | myeloid leukocyte mediated immunity                                  | 3/37 | 104/18800 | 0.0011145 | 0.0172 | 0.0111 |  | ITGAM/FGR/FCGR2B  | 3 |
|    | 444     |                                                                      |      |           | 23        | 75101  | 7189   |  |                   |   |
| BP | GO:0007 | cell-matrix adhesion                                                 | 4/37 | 235/18800 | 0.0011369 | 0.0174 | 0.0112 |  | MMP12/ITGAM/FN1/  | 4 |
|    | 160     |                                                                      |      |           | 31        | 24426  | 68459  |  | NRP1              |   |
| BP | GO:0002 | regulation of leukocyte mediated immunity                            | 4/37 | 236/18800 | 0.0011549 | 0.0175 | 0.0113 |  | TREM2/ITGAM/FGR/  | 4 |
|    | 703     |                                                                      |      |           | 15        | 03385  | 19522  |  | FCGR2B            |   |
| BP | GO:0002 | immune response-regulating cell surface receptor signaling pathway   | 2/37 | 26/18800  | 0.0011889 | 0.0176 | 0.0113 |  | FGR/FCGR2B        | 2 |
|    | 433     |                                                                      |      |           | 58        | 27591  | 99847  |  |                   |   |
| BP | GO:0038 | involved in phagocytosis                                             | 2/37 | 26/18800  | 0.0011889 | 0.0176 | 0.0113 |  | FGR/FCGR2B        | 2 |
|    | 096     |                                                                      |      |           | 58        | 27591  | 99847  |  |                   |   |
| BP | GO:0061 | regulation of extent of cell growth                                  | 3/37 | 108/18800 | 0.0012427 | 0.0182 | 0.0117 |  | TRPV2/FN1/NRP1    | 3 |
|    | 387     |                                                                      |      |           | 55        | 21973  | 84236  |  |                   |   |
| BP | GO:0034 | substrate adhesion-dependent cell spreading                          | 3/37 | 109/18800 | 0.0012762 | 0.0182 | 0.0117 |  | PARVB/FN1/NRP1    | 3 |
|    | 446     |                                                                      |      |           | 03        | 21973  | 84236  |  |                   |   |
| BP | GO:0032 | interferon-alpha production                                          | 2/37 | 27/18800  | 0.0012824 | 0.0182 | 0.0117 |  | MMP12/TLR8        | 2 |
|    | 607     |                                                                      |      |           | 85        | 21973  | 84236  |  |                   |   |
| BP | GO:0032 | regulation of interferon-alpha production                            | 2/37 | 27/18800  | 0.0012824 | 0.0182 | 0.0117 |  | MMP12/TLR8        | 2 |
|    | 647     |                                                                      |      |           | 85        | 21973  | 84236  |  |                   |   |
| BP | GO:1901 | regulation of                                                        | 3/37 | 110/18800 | 0.0013102 | 0.0184 | 0.0119 |  | CD86/TREM2/LAPTM  | 3 |



|    |            |                                                                         |      |           |           |        |        |   |                   |   |
|----|------------|-------------------------------------------------------------------------|------|-----------|-----------|--------|--------|---|-------------------|---|
|    | 222        | NIK/NF-kappaB signaling                                                 |      |           | 14        | 24035  | 14911  | 5 |                   |   |
|    |            | negative regulation of interleukin-2 production                         |      |           |           |        |        |   |                   |   |
| BP | GO:0032703 |                                                                         | 2/37 | 28/18800  | 0.0013794 | 0.0191 | 0.0124 |   | LAPTM5/VSIG4      | 2 |
|    |            |                                                                         |      |           | 28        | 99389  | 16336  |   |                   |   |
| BP | GO:0071216 | cellular response to biotic stimulus                                    | 4/37 | 256/18800 | 0.0015580 | 0.0213 | 0.0138 |   | MRC1/CD86/TREM2/F | 4 |
|    |            |                                                                         |      |           | 33        | 85237  | 29934  |   | CGR2B             |   |
| BP | GO:0038094 | Fc-gamma receptor signaling pathway                                     | 2/37 | 30/18800  | 0.0015835 | 0.0213 | 0.0138 |   | FGR/FCGR2B        | 2 |
|    |            | regulation of syncytium formation by plasma membrane fusion             |      |           |           |        |        |   |                   |   |
| BP | GO:0060142 |                                                                         | 2/37 | 30/18800  | 0.0015835 | 0.0213 | 0.0138 |   | TREM2/CD53        | 2 |
|    |            |                                                                         |      |           | 11        | 85237  | 29934  |   |                   |   |
| BP | GO:0030282 | bone mineralization                                                     | 3/37 | 121/18800 | 0.0017225 | 0.0228 | 0.0147 |   | ALOX5/FGR/CCR1    | 3 |
|    |            |                                                                         |      |           | 2         | 10844  | 51881  |   |                   |   |
| BP | GO:0048675 | axon extension                                                          | 3/37 | 121/18800 | 0.0017225 | 0.0228 | 0.0147 |   | TRPV2/FN1/NRP1    | 3 |
|    |            |                                                                         |      |           | 2         | 10844  | 51881  |   |                   |   |
| BP | GO:0002224 | toll-like receptor signaling pathway                                    | 3/37 | 123/18800 | 0.0018052 | 0.0236 | 0.0153 |   | TREM2/TLR8/PIK3AP | 3 |
|    |            |                                                                         |      |           | 15        | 76087  | 11437  | 1 |                   |   |
| BP | GO:0022407 | regulation of cell-cell adhesion                                        | 5/37 | 456/18800 | 0.0018873 | 0.0239 | 0.0154 |   | ALOX5/CD86/LAPTM  | 5 |
|    |            |                                                                         |      |           | 59        | 62981  | 96973  |   | 5/VSIG4/FCGR2B    |   |
| BP | GO:0002443 | leukocyte mediated immunity                                             | 5/37 | 457/18800 | 0.0019055 | 0.0239 | 0.0154 |   | TREM2/TLR8/ITGAM/ | 5 |
|    |            |                                                                         |      |           | 28        | 62981  | 96973  |   | FGR/FCGR2B        |   |
| BP | GO:0002431 | Fc receptor mediated stimulatory signaling pathway                      | 2/37 | 33/18800  | 0.0019149 | 0.0239 | 0.0154 |   | FGR/FCGR2B        | 2 |
|    |            |                                                                         |      |           | 3         | 62981  | 96973  |   |                   |   |
| BP | GO:0036336 | dendritic cell migration                                                | 2/37 | 33/18800  | 0.0019149 | 0.0239 | 0.0154 |   | ALOX5/CCR1        | 2 |
|    |            | negative regulation of antigen receptor-mediated signaling pathway      |      |           |           |        |        |   |                   |   |
| BP | GO:0050858 |                                                                         | 2/37 | 33/18800  | 0.0019149 | 0.0239 | 0.0154 |   | LAPTM5/FCGR2B     | 2 |
|    |            |                                                                         |      |           | 3         | 62981  | 96973  |   |                   |   |
| BP | GO:1903532 | positive regulation of secretion by cell                                | 4/37 | 274/18800 | 0.0019969 | 0.0245 | 0.0158 |   | TREM2/ITGAM/RETN  | 4 |
|    |            |                                                                         |      |           | 05        | 2903   | 6304   |   | /FGR              |   |
| BP | GO:0006911 | phagocytosis, engulfment                                                | 3/37 | 128/18800 | 0.0020227 | 0.0245 | 0.0158 |   | TREM2/ITGAM/FCGR  | 3 |
|    |            | antigen processing and presentation of peptide antigen via MHC class II |      |           |           |        |        |   |                   |   |
| BP | GO:0002495 |                                                                         | 2/37 | 34/18800  | 0.0020320 | 0.0245 | 0.0158 |   | TREM2/FCGR2B      | 2 |
|    |            |                                                                         |      |           | 97        | 2903   | 6304   |   |                   |   |
| BP | GO:0006691 | leukotriene metabolic process                                           | 2/37 | 34/18800  | 0.0020320 | 0.0245 | 0.0158 |   | ALOX5/ALOX5AP     | 2 |
|    |            |                                                                         |      |           | 97        | 2903   | 6304   |   |                   |   |
| BP | GO:0050869 | negative regulation of B cell activation                                | 2/37 | 35/18800  | 0.0021525 | 0.0257 | 0.0166 |   | LAPTM5/FCGR2B     | 2 |
|    |            |                                                                         |      |           | 89        | 55541  | 5623   |   |                   |   |

|    |                |                                                                             |      |           |                 |                 |                 |                                   |   |
|----|----------------|-----------------------------------------------------------------------------|------|-----------|-----------------|-----------------|-----------------|-----------------------------------|---|
| BP | GO:1902<br>105 | regulation of<br>leukocyte<br>differentiation                               | 4/37 | 283/18800 | 0.0022456<br>37 | 0.0266<br>35203 | 0.0172<br>25112 | CD86/TREM2/FCGR2<br>B/CCR1        | 4 |
| BP | GO:0002<br>504 | antigen processing<br>and presentation of<br>peptide or<br>polysaccharide   | 2/37 | 36/18800  | 0.0022763<br>94 | 0.0267<br>67252 | 0.0173<br>10509 | TREM2/FCGR2B                      | 2 |
| BP | GO:0045<br>730 | antigen via MHC<br>class II<br>respiratory burst                            | 2/37 | 37/18800  | 0.0024034<br>98 | 0.0280<br>06994 | 0.0181<br>12256 | CYBB/TREM2                        | 2 |
| BP | GO:0031<br>349 | positive regulation of<br>defense response                                  | 4/37 | 289/18800 | 0.0024228<br>92 | 0.0280<br>06994 | 0.0181<br>12256 | ALOX5AP/MMP12/TR<br>EM2/TLR8      | 4 |
| BP | GO:0099<br>024 | plasma membrane<br>invagination                                             | 3/37 | 137/18800 | 0.0024539<br>8  | 0.0281<br>27968 | 0.0181<br>9049  | TREM2/ITGAM/FCGR<br>2B            | 3 |
| BP | GO:0043<br>410 | positive regulation of<br>MAPK cascade                                      | 5/37 | 491/18800 | 0.0026033<br>49 | 0.0289<br>36924 | 0.0187<br>13646 | TREM2/LAPTM5/NRP<br>1/FCGR2B/CCR1 | 5 |
| BP | GO:1901<br>652 | response to peptide                                                         | 5/37 | 491/18800 | 0.0026033<br>49 | 0.0289<br>36924 | 0.0187<br>13646 | CYBB/MMP12/TREM<br>2/RETN/FCGR2B  | 5 |
| BP | GO:0050<br>921 | positive regulation of<br>chemotaxis                                        | 3/37 | 140/18800 | 0.0026094<br>15 | 0.0289<br>36924 | 0.0187<br>13646 | TREM2/NRP1/CCR1                   | 3 |
| BP | GO:1903<br>305 | regulation of<br>regulated secretory<br>pathway                             | 3/37 | 140/18800 | 0.0026094<br>15 | 0.0289<br>36924 | 0.0187<br>13646 | ITGAM/FGR/FCGR2B                  | 3 |
| BP | GO:0038<br>061 | NIK/NF-kappaB<br>signaling                                                  | 3/37 | 141/18800 | 0.0026625<br>49 | 0.0291<br>08364 | 0.0188<br>24517 | CD86/TREM2/LAPTM<br>5             | 3 |
| BP | GO:0097<br>242 | amyloid-beta<br>clearance                                                   | 2/37 | 39/18800  | 0.0026675<br>55 | 0.0291<br>08364 | 0.0188<br>24517 | TREM2/ITGAM                       | 2 |
| BP | GO:0002<br>429 | immune<br>response-activating<br>cell surface receptor<br>signaling pathway | 4/37 | 300/18800 | 0.0027725<br>68 | 0.0295<br>45178 | 0.0191<br>07006 | LAPTM5/FPR3/FGR/F<br>CGR2B        | 4 |
| BP | GO:0002<br>757 | immune<br>response-activating<br>signal transduction                        | 4/37 | 300/18800 | 0.0027725<br>68 | 0.0295<br>45178 | 0.0191<br>07006 | LAPTM5/FPR3/FGR/F<br>CGR2B        | 4 |
| BP | GO:0051<br>047 | positive regulation of<br>secretion                                         | 4/37 | 300/18800 | 0.0027725<br>68 | 0.0295<br>45178 | 0.0191<br>07006 | TREM2/ITGAM/RETN<br>/FGR          | 4 |
| BP | GO:0010<br>324 | membrane<br>invagination                                                    | 3/37 | 144/18800 | 0.0028259<br>63 | 0.0298<br>80725 | 0.0193<br>24007 | TREM2/ITGAM/FCGR<br>2B            | 3 |
| BP | GO:0022<br>604 | regulation of cell<br>morphogenesis                                         | 4/37 | 305/18800 | 0.0029424<br>21 | 0.0306<br>60417 | 0.0198<br>28237 | PARVB/FN1/NRP1/FG<br>R            | 4 |
| BP | GO:0042<br>119 | neutrophil activation                                                       | 2/37 | 41/18800  | 0.0029446<br>59 | 0.0306<br>60417 | 0.0198<br>28237 | ITGAM/FCGR2B                      | 2 |
| BP | GO:0034        | toll-like receptor 4                                                        | 2/37 | 42/18800  | 0.0030880       | 0.0319          | 0.0206          | TREM2/PIK3AP1                     | 2 |

|    |         |                                                             |      |           |           |        |        |                    |   |
|----|---------|-------------------------------------------------------------|------|-----------|-----------|--------|--------|--------------------|---|
|    | 142     | signaling pathway                                           |      |           | 71        | 10071  | 36394  |                    |   |
| BP | GO:0006 | phagocytosis                                                | 4/37 | 310/18800 | 0.0031192 | 0.0319 | 0.0206 | TREM2/ITGAM/FCGR2B | 4 |
|    | 909     |                                                             |      |           | 93        | 90339  | 88304  |                    |   |
| BP | GO:0070 | regulation of ERK1 and ERK2 cascade                         | 4/37 | 311/18800 | 0.0031555 | 0.0321 | 0.0207 | TREM2/FN1/NRP1/CC  | 4 |
|    | 372     |                                                             |      |           | 22        | 20386  | 72406  | R1                 |   |
| BP | GO:1901 | regulation of neuron death                                  | 4/37 | 313/18800 | 0.0032288 | 0.0322 | 0.0208 | TREM2/ITGAM/NRP1   | 4 |
|    | 214     |                                                             |      |           | 44        | 05411  | 27392  | /FCGR2B            |   |
| BP | GO:0008 | regulation of cell shape                                    | 3/37 | 151/18800 | 0.0032310 | 0.0322 | 0.0208 | PARVB/FN1/FGR      | 3 |
|    | 360     |                                                             |      |           | 04        | 05411  | 27392  |                    |   |
| BP | GO:0042 | superoxide anion generation                                 | 2/37 | 43/18800  | 0.0032347 | 0.0322 | 0.0208 | CYBB/ITGAM         | 2 |
|    | 554     |                                                             |      |           | 08        | 05411  | 27392  |                    |   |
| BP | GO:0006 | humoral immune response                                     | 4/37 | 317/18800 | 0.0033789 | 0.0331 | 0.0214 | ALOX5/TREM2/VSIG   | 4 |
|    | 959     |                                                             |      |           | 76        | 5772   | 43254  | 4/FCGR2B           |   |
| BP | GO:0019 | viral life cycle                                            | 4/37 | 317/18800 | 0.0033789 | 0.0331 | 0.0214 | MRC1/CLEC5A/CD86/  | 4 |
|    | 058     |                                                             |      |           | 76        | 5772   | 43254  | NRP1               |   |
| BP | GO:0050 | regulation of axonogenesis                                  | 3/37 | 154/18800 | 0.0034149 | 0.0332 | 0.0215 | TRPV2/FN1/NRP1     | 3 |
|    | 770     |                                                             |      |           | 44        | 71314  | 16717  |                    |   |
| BP | GO:1904 | cellular response to amyloid-beta                           | 2/37 | 45/18800  | 0.0035376 | 0.0342 | 0.0221 | TREM2/FCGR2B       | 2 |
|    | 646     |                                                             |      |           | 01        | 21903  | 31467  |                    |   |
| BP | GO:1902 | positive regulation of leukocyte differentiation            | 3/37 | 157/18800 | 0.0036051 | 0.0343 | 0.0222 | CD86/TREM2/CCR1    | 3 |
|    | 107     |                                                             |      |           | 97        | 88028  | 38901  |                    |   |
| BP | GO:1903 | positive regulation of hemopoiesis                          | 3/37 | 157/18800 | 0.0036051 | 0.0343 | 0.0222 | CD86/TREM2/CCR1    | 3 |
|    | 708     |                                                             |      |           | 97        | 88028  | 38901  |                    |   |
| BP | GO:0002 | response-regulating cell surface receptor signaling pathway | 4/37 | 328/18800 | 0.0038163 | 0.0355 | 0.0229 | LAPTM5/FPR3/FGR/F  | 4 |
|    | 768     |                                                             |      |           | 36        | 12293  | 65968  | CGR2B              |   |
| BP | GO:0001 | microglial cell activation                                  | 2/37 | 47/18800  | 0.0038532 | 0.0355 | 0.0229 | TREM2/ITGAM        | 2 |
|    | 774     |                                                             |      |           | 4         | 12293  | 65968  |                    |   |
| BP | GO:0002 | regulation of acute inflammatory response                   | 2/37 | 47/18800  | 0.0038532 | 0.0355 | 0.0229 | ALOX5AP/FCGR2B     | 2 |
|    | 673     |                                                             |      |           | 4         | 12293  | 65968  |                    |   |
| BP | GO:0036 | granulocyte activation                                      | 2/37 | 47/18800  | 0.0038532 | 0.0355 | 0.0229 | ITGAM/FCGR2B       | 2 |
|    | 230     |                                                             |      |           | 4         | 12293  | 65968  |                    |   |
| BP | GO:0097 | dendritic cell differentiation                              | 2/37 | 47/18800  | 0.0038532 | 0.0355 | 0.0229 | TREM2/FCGR2B       | 2 |
|    | 028     |                                                             |      |           | 4         | 12293  | 65968  |                    |   |
| BP | GO:0070 | leukocyte proliferation                                     | 4/37 | 330/18800 | 0.0038997 | 0.0357 | 0.0230 | CD86/TREM2/VSIG4/  | 4 |
|    | 661     |                                                             |      |           | 98        | 00165  | 87466  | FCGR2B             |   |
| BP | GO:0030 | positive regulation of cell growth                          | 3/37 | 163/18800 | 0.0040049 | 0.0358 | 0.0231 | TRPV2/FN1/NRP1     | 3 |
|    | 307     |                                                             |      |           | 08        | 01056  | 52713  |                    |   |
| BP | GO:0099 | postsynapse organization                                    | 3/37 | 163/18800 | 0.0040049 | 0.0358 | 0.0231 | TREM2/NRP1/FCGR2   | 3 |
|    | 173     |                                                             |      |           | 08        | 01056  | 52713  | B                  |   |
| BP | GO:0006 | acute-phase response                                        | 2/37 | 48/18800  | 0.0040158 | 0.0358 | 0.0231 | FN1/CD163          | 2 |



|    |                |                                                                |      |           |                 |                 |                 |                            |   |
|----|----------------|----------------------------------------------------------------|------|-----------|-----------------|-----------------|-----------------|----------------------------|---|
| BP | GO:0006<br>887 | exocytosis                                                     | 4/37 | 357/18800 | 0.0051509<br>33 | 0.0413<br>28665 | 0.0267<br>27443 | ITGAM/FGR/FCGR2B<br>/CCR1  | 4 |
| BP | GO:0008<br>361 | regulation of cell size                                        | 3/37 | 179/18800 | 0.0051994<br>69 | 0.0414<br>74131 | 0.0268<br>21517 | TRPV2/FN1/NRP1             | 3 |
| BP | GO:0002<br>763 | positive regulation of<br>myeloid leukocyte<br>differentiation | 2/37 | 55/18800  | 0.0052412<br>64 | 0.0415<br>64444 | 0.0268<br>79923 | TREM2/CCR1                 | 2 |
| BP | GO:0050<br>767 | regulation of<br>neurogenesis                                  | 4/37 | 361/18800 | 0.0053567<br>12 | 0.0422<br>34426 | 0.0273<br>13204 | TRPV2/TREM2/FN1/N<br>RP1   | 4 |
| BP | GO:0046<br>456 | icosanoid<br>biosynthetic process                              | 2/37 | 57/18800  | 0.0056191<br>47 | 0.0440<br>48949 | 0.0284<br>86664 | ALOX5/ALOX5AP              | 2 |
| BP | GO:0032<br>481 | positive regulation of<br>type I interferon<br>production      | 2/37 | 58/18800  | 0.0058126<br>54 | 0.0451<br>74571 | 0.0292<br>14609 | MMP12/TLR8                 | 2 |
| BP | GO:0071<br>706 | tumor necrosis factor<br>superfamily cytokine<br>production    | 3/37 | 187/18800 | 0.0058690<br>32 | 0.0451<br>74571 | 0.0292<br>14609 | CYBB/CD86/TREM2            | 3 |
| BP | GO:1903<br>555 | necrosis factor<br>superfamily cytokine<br>production          | 3/37 | 187/18800 | 0.0058690<br>32 | 0.0451<br>74571 | 0.0292<br>14609 | CYBB/CD86/TREM2            | 3 |
| BP | GO:1903<br>706 | regulation of<br>hemopoiesis                                   | 4/37 | 371/18800 | 0.0058952<br>15 | 0.0451<br>74571 | 0.0292<br>14609 | CD86/TREM2/FCGR2<br>B/CCR1 | 4 |
| BP | GO:0000<br>768 | syncytium formation<br>by plasma membrane<br>fusion            | 2/37 | 59/18800  | 0.0060091<br>88 | 0.0452<br>84706 | 0.0292<br>85834 | TREM2/CD53                 | 2 |
| BP | GO:0001<br>755 | neural crest cell<br>migration                                 | 2/37 | 59/18800  | 0.0060091<br>88 | 0.0452<br>84706 | 0.0292<br>85834 | FN1/NRP1                   | 2 |
| BP | GO:0140<br>253 | cell-cell fusion                                               | 2/37 | 59/18800  | 0.0060091<br>88 | 0.0452<br>84706 | 0.0292<br>85834 | TREM2/CD53                 | 2 |
| BP | GO:1903<br>409 | reactive oxygen<br>species biosynthetic<br>process             | 2/37 | 61/18800  | 0.0064112<br>88 | 0.0480<br>49434 | 0.0310<br>73797 | CYBB/ALOX5                 | 2 |
| BP | GO:0002<br>712 | regulation of B cell<br>mediated immunity                      | 2/37 | 62/18800  | 0.0066168<br>31 | 0.0489<br>98856 | 0.0316<br>87792 | TREM2/FCGR2B               | 2 |
| BP | GO:0002<br>889 | regulation of<br>immunoglobulin<br>mediated immune<br>response | 2/37 | 62/18800  | 0.0066168<br>31 | 0.0489<br>98856 | 0.0316<br>87792 | TREM2/FCGR2B               | 2 |
| BP | GO:0006<br>949 | syncytium formation                                            | 2/37 | 63/18800  | 0.0068253<br>54 | 0.0489<br>98856 | 0.0316<br>87792 | TREM2/CD53                 | 2 |
| BP | GO:0032<br>613 | interleukin-10<br>production                                   | 2/37 | 63/18800  | 0.0068253<br>54 | 0.0489<br>98856 | 0.0316<br>87792 | TREM2/FCGR2B               | 2 |
| BP | GO:0032        | interleukin-12                                                 | 2/37 | 63/18800  | 0.0068253       | 0.0489          | 0.0316          | TLR8/LAPTM5                | 2 |

|    |         |                                                           |      |           |           |        |        |                             |  |   |
|----|---------|-----------------------------------------------------------|------|-----------|-----------|--------|--------|-----------------------------|--|---|
|    | 615     | production                                                |      |           | 54        | 98856  | 87792  |                             |  |   |
| BP | GO:0032 | regulation of interleukin-10                              | 2/37 | 63/18800  | 0.0068253 | 0.0489 | 0.0316 | TREM2/FCGR2B                |  | 2 |
|    | 653     | production                                                |      |           | 54        | 98856  | 87792  |                             |  |   |
| BP | GO:0032 | regulation of interleukin-12                              | 2/37 | 63/18800  | 0.0068253 | 0.0489 | 0.0316 | TLR8/LAPTM5                 |  | 2 |
|    | 655     | production                                                |      |           | 54        | 98856  | 87792  |                             |  |   |
| BP | GO:0048 | antigen processing and presentation of peptide antigen    | 2/37 | 63/18800  | 0.0068253 | 0.0489 | 0.0316 | TREM2/FCGR2B                |  | 2 |
|    | 002     |                                                           |      |           | 54        | 98856  | 87792  |                             |  |   |
| BP | GO:0045 | regulation of osteoclast differentiation                  | 2/37 | 64/18800  | 0.0070368 | 0.0502 | 0.0324 | TREM2/CCR1                  |  | 2 |
|    | 670     |                                                           |      |           | 44        | 52644  | 98623  |                             |  |   |
| BP | GO:0009 | response to virus                                         | 4/37 | 392/18800 | 0.0071417 | 0.0507 | 0.0328 | MLKL/MMP12/TLR8/<br>FGR     |  | 4 |
|    | 615     |                                                           |      |           | 25        | 36008  | 11217  |                             |  |   |
| BP | GO:0043 | cellular component maintenance                            | 2/37 | 65/18800  | 0.0072512 | 0.0512 | 0.0331 | TREM2/FCGR2B                |  | 2 |
|    | 954     |                                                           |      |           | 89        | 47455  | 41972  |                             |  |   |
| BP | GO:0017 | regulation of exocytosis                                  | 3/37 | 204/18800 | 0.0074575 | 0.0522 | 0.0337 | ITGAM/FGR/FCGR2B            |  | 3 |
|    | 157     |                                                           |      |           | 42        | 42451  | 85441  |                             |  |   |
| BP | GO:0050 | regulation of antigen receptor-mediated signaling pathway | 2/37 | 66/18800  | 0.0074686 | 0.0522 | 0.0337 | LAPTM5/FCGR2B               |  | 2 |
|    | 854     |                                                           |      |           | 79        | 42451  | 85441  |                             |  |   |
| BP | GO:0043 | regulation of neuron apoptotic process                    | 3/37 | 207/18800 | 0.0077617 | 0.0540 | 0.0349 | TREM2/ITGAM/NRP1            |  | 3 |
|    | 523     |                                                           |      |           | 49        | 15438  | 3204   |                             |  |   |
| BP | GO:0042 | negative regulation of T cell proliferation               | 2/37 | 68/18800  | 0.0079122 | 0.0547 | 0.0354 | CD86/VSIG4                  |  | 2 |
|    | 130     |                                                           |      |           | 42        | 8324   | 28581  |                             |  |   |
| BP | GO:0050 | positive regulation of phagocytosis                       | 2/37 | 71/18800  | 0.0085993 | 0.0592 | 0.0383 | TREM2/FCGR2B                |  | 2 |
|    | 766     |                                                           |      |           | 73        | 40123  | 10868  |                             |  |   |
| BP | GO:0016 | immunoglobulin mediated immune response                   | 3/37 | 216/18800 | 0.0087181 | 0.0597 | 0.0386 | TREM2/TLR8/FCGR2<br>B       |  | 3 |
|    | 064     |                                                           |      |           | 86        | 56812  | 45013  |                             |  |   |
| BP | GO:0010 | regulation of cell-substrate adhesion                     | 3/37 | 217/18800 | 0.0088285 | 0.0597 | 0.0386 | MMP12/FN1/NRP1              |  | 3 |
|    | 810     |                                                           |      |           | 45        | 77779  | 58573  |                             |  |   |
| BP | GO:0006 | superoxide metabolic process                              | 2/37 | 72/18800  | 0.0088341 | 0.0597 | 0.0386 | CYBB/ITGAM                  |  | 2 |
|    | 801     |                                                           |      |           | 79        | 77779  | 58573  |                             |  |   |
| BP | GO:0016 | viral process                                             | 4/37 | 418/18800 | 0.0089132 | 0.0597 | 0.0386 | MRC1/CLEC5A/CD86/<br>NRP1   |  | 4 |
|    | 032     |                                                           |      |           | 54        | 77779  | 58573  |                             |  |   |
| BP | GO:0050 | synapse organization                                      | 4/37 | 419/18800 | 0.0089866 | 0.0597 | 0.0386 | TREM2/ITGAM/NRP1<br>/FCGR2B |  | 4 |
|    | 808     |                                                           |      |           | 31        | 77779  | 58573  |                             |  |   |
| BP | GO:0019 | B cell mediated immunity                                  | 3/37 | 219/18800 | 0.0090517 | 0.0597 | 0.0386 | TREM2/TLR8/FCGR2<br>B       |  | 3 |
|    | 724     |                                                           |      |           | 33        | 77779  | 58573  |                             |  |   |
| BP | GO:0001 | ossification                                              | 4/37 | 420/18800 | 0.0090604 | 0.0597 | 0.0386 | CLEC5A/ALOX5/FGR<br>/CCR1   |  | 4 |
|    | 503     |                                                           |      |           | 04        | 77779  | 58573  |                             |  |   |

|    |         |                                                                                 |      |           |                 |                 |                 |                          |   |
|----|---------|---------------------------------------------------------------------------------|------|-----------|-----------------|-----------------|-----------------|--------------------------|---|
| BP | GO:0045 | negative regulation<br>of innate immune<br>response                             | 2/37 | 73/18800  | 0.0090718<br>48 | 0.0597<br>77779 | 0.0386<br>58573 | MMP12/VSIG4              | 2 |
| BP | GO:0150 | neuroinflammatory<br>response                                                   | 2/37 | 73/18800  | 0.0090718<br>48 | 0.0597<br>77779 | 0.0386<br>58573 | TREM2/ITGAM              | 2 |
| BP | GO:0002 | positive regulation of<br>leukocyte activation                                  | 4/37 | 421/18800 | 0.0091345<br>75 | 0.0598<br>10844 | 0.0386<br>79956 | CD86/TREM2/ITGAM/<br>FGR | 4 |
| BP | GO:0070 | positive regulation of<br>ERK1 and ERK2<br>cascade                              | 3/37 | 220/18800 | 0.0091645<br>65 | 0.0598<br>10844 | 0.0386<br>79956 | TREM2/NRP1/CCR1          | 3 |
| BP | GO:0002 | regulation of<br>immunoglobulin<br>production                                   | 2/37 | 74/18800  | 0.0093123<br>67 | 0.0604<br>8604  | 0.0391<br>16609 | CD86/FCGR2B              | 2 |
| BP | GO:0050 | positive regulation of<br>neurogenesis<br>cytokine production                   | 3/37 | 222/18800 | 0.0093927<br>1  | 0.0607<br>18749 | 0.0392<br>67103 | TRPV2/FN1/NRP1           | 3 |
| BP | GO:0002 | involved in<br>inflammatory<br>response<br>regulation of<br>cytokine production | 2/37 | 75/18800  | 0.0095557<br>25 | 0.0611<br>92531 | 0.0395<br>73499 | ALOX5/TREM2              | 2 |
| BP | GO:1900 | involved in<br>inflammatory<br>response                                         | 2/37 | 75/18800  | 0.0095557<br>25 | 0.0611<br>92531 | 0.0395<br>73499 | ALOX5/TREM2              | 2 |
| BP | GO:0050 | regulation of<br>chemotaxis                                                     | 3/37 | 225/18800 | 0.0097411<br>5  | 0.0620<br>88453 | 0.0401<br>52897 | TREM2/NRP1/CCR1          | 3 |
| BP | GO:0048 | developmental cell<br>growth                                                    | 3/37 | 227/18800 | 0.0099776<br>07 | 0.0632<br>99798 | 0.0409<br>36279 | TRPV2/FN1/NRP1           | 3 |
| BP | GO:0050 | positive regulation of<br>cell activation                                       | 4/37 | 436/18800 | 0.0102953<br>92 | 0.0649<br>85249 | 0.0420<br>26268 | CD86/TREM2/ITGAM/<br>FGR | 4 |
| BP | GO:0050 | regulation of<br>lymphocyte<br>proliferation                                    | 3/37 | 230/18800 | 0.0103385<br>62 | 0.0649<br>85249 | 0.0420<br>26268 | CD86/VSIG4/FCGR2B        | 3 |
| BP | GO:0072 | reactive oxygen<br>species metabolic<br>process                                 | 3/37 | 231/18800 | 0.0104605<br>57 | 0.0654<br>50458 | 0.0423<br>27121 | CYBB/ALOX5/ITGA<br>M     | 3 |
| BP | GO:0051 | regulation of nervous<br>system development                                     | 4/37 | 440/18800 | 0.0106204<br>35 | 0.0661<br>47367 | 0.0427<br>77815 | TRPV2/TREM2/FN1/N<br>RP1 | 4 |
| BP | GO:0032 | regulation of<br>mononuclear cell<br>proliferation                              | 3/37 | 233/18800 | 0.0107070<br>68 | 0.0662<br>52395 | 0.0428<br>45738 | CD86/VSIG4/FCGR2B        | 3 |
| BP | GO:0097 | dendritic spine<br>organization                                                 | 2/37 | 80/18800  | 0.0108147<br>02 | 0.0662<br>52395 | 0.0428<br>45738 | TREM2/FCGR2B             | 2 |
| BP | GO:0045 | regulated exocytosis                                                            | 3/37 | 234/18800 | 0.0108315       | 0.0662          | 0.0428          | ITGAM/FGR/FCGR2B         | 3 |

|    |         |                                                            |      |           |           |        |        |       |                   |   |
|----|---------|------------------------------------------------------------|------|-----------|-----------|--------|--------|-------|-------------------|---|
|    | 055     |                                                            |      |           | 87        | 52395  | 45738  |       |                   |   |
|    |         | developmental                                              |      |           |           |        |        |       |                   |   |
| BP | GO:0060 | growth involved in                                         | 3/37 | 234/18800 | 0.0108315 | 0.0662 | 0.0428 |       |                   |   |
|    | 560     | morphogenesis                                              |      |           |           | 87     | 52395  | 45738 | TRPV2/FN1/NRP1    | 3 |
| BP | GO:0030 | regulation of bone mineralization                          | 2/37 | 81/18800  | 0.0110748 | 0.0674 | 0.0435 |       | ALOX5/CCR1        | 2 |
| BP | GO:0045 | positive regulation of cell adhesion                       | 4/37 | 446/18800 | 0.0111204 | 0.0674 | 0.0435 |       | ALOX5/CD86/FN1/NR | 4 |
|    | 785     | regulation of response to endoplasmic reticulum stress     |      |           |           | 33     | 14537  | 97301 | P1                |   |
| BP | GO:1905 | response to endoplasmic reticulum stress                   | 2/37 | 82/18800  | 0.0113377 | 0.0681 | 0.0440 |       | ALOX5/FCGR2B      | 2 |
|    | 897     |                                                            |      |           |           | 67     | 28528  | 59042 |                   |   |
| BP | GO:0098 | import into cell                                           | 3/37 | 238/18800 | 0.0113381 | 0.0681 | 0.0440 |       | TRPV2/TREM2/SLC2  | 3 |
|    | 657     |                                                            |      |           |           | 06     | 28528  | 59042 | A3                |   |
| BP | GO:0014 | neural crest cell development                              | 2/37 | 83/18800  | 0.0116034 | 0.0691 | 0.0446 |       | FN1/NRP1          | 2 |
|    | 032     |                                                            |      |           |           | 27     | 13863  | 96263 |                   |   |
| BP | GO:0045 | positive regulation of exocytosis                          | 2/37 | 83/18800  | 0.0116034 | 0.0691 | 0.0446 |       | ITGAM/FGR         | 2 |
|    | 921     |                                                            |      |           |           | 27     | 13863  | 96263 |                   |   |
| BP | GO:0051 | neuron apoptotic process                                   | 3/37 | 241/18800 | 0.0117268 | 0.0695 | 0.0449 |       | TREM2/ITGAM/NRP1  | 3 |
|    | 402     |                                                            |      |           |           | 91     | 45563  | 75445 |                   |   |
| BP | GO:0001 | regulation of leukocyte mediated cytotoxicity              | 2/37 | 85/18800  | 0.0121429 | 0.0717 | 0.0463 |       | ITGAM/FCGR2B      | 2 |
|    | 910     |                                                            |      |           |           | 47     | 01214  | 69515 |                   |   |
| BP | GO:0022 | cellular component disassembly                             | 4/37 | 460/18800 | 0.0123459 | 0.0725 | 0.0469 |       | MMP12/TREM2/ITGA  | 4 |
|    | 411     |                                                            |      |           |           | 93     | 43092  | 13962 | M/DNASE2B         |   |
| BP | GO:0006 | receptor-mediated endocytosis                              | 3/37 | 246/18800 | 0.0123918 | 0.0725 | 0.0469 |       | MRC1/ITGAM/FCGR2  | 3 |
|    | 898     |                                                            |      |           |           | 92     | 43092  | 13962 | B                 |   |
| BP | GO:0001 | negative regulation of cytokine-mediated signaling pathway | 2/37 | 87/18800  | 0.0126933 | 0.0736 | 0.0476 |       | MMP12/TREM2       | 2 |
|    | 960     |                                                            |      |           |           | 26     | 75306  | 46169 |                   |   |
| BP | GO:1901 | positive regulation of neuron death                        | 2/37 | 87/18800  | 0.0126933 | 0.0736 | 0.0476 |       | ITGAM/FCGR2B      | 2 |
|    | 216     |                                                            |      |           |           | 26     | 75306  | 46169 |                   |   |
| BP | GO:0014 | mesenchymal cell development                               | 2/37 | 88/18800  | 0.0129725 | 0.0746 | 0.0482 |       | FN1/NRP1          | 2 |
|    | 031     |                                                            |      |           |           | 59     | 60638  | 83388 |                   |   |
| BP | GO:0048 | stem cell development                                      | 2/37 | 88/18800  | 0.0129725 | 0.0746 | 0.0482 |       | FN1/NRP1          | 2 |
|    | 864     |                                                            |      |           |           | 59     | 60638  | 83388 |                   |   |
| BP | GO:0070 | chemokine-mediated signaling pathway                       | 2/37 | 89/18800  | 0.0132544 | 0.0756 | 0.0489 |       | TREM2/CCR1        | 2 |
|    | 098     |                                                            |      |           |           | 74     | 44781  | 19839 |                   |   |
| BP | GO:0106 | neuron projection organization                             | 2/37 | 89/18800  | 0.0132544 | 0.0756 | 0.0489 |       | TREM2/FCGR2B      | 2 |
|    | 027     |                                                            |      |           |           | 74     | 44781  | 19839 |                   |   |
| BP | GO:0070 | regulation of leukocyte proliferation                      | 3/37 | 254/18800 | 0.0135004 | 0.0767 | 0.0496 |       | CD86/VSIG4/FCGR2B | 3 |
|    | 663     |                                                            |      |           |           | 11     | 27338  | 19933 |                   |   |
| CC | GO:0070 | tertiary granule                                           | 6/38 | 73/19594  | 5.45E-09  | 5.88E- | 4.64E- |       | MCEMP1/CLEC5A/C   | 6 |



|    |         |                                                                                                                                                 |      |           |           |        |        |                                |   |
|----|---------|-------------------------------------------------------------------------------------------------------------------------------------------------|------|-----------|-----------|--------|--------|--------------------------------|---|
|    | 821     | membrane                                                                                                                                        |      |           |           | 07     | 07     | YBB/ITGAM/SLC2A3/<br>CD53      |   |
| CC | GO:0035 | specific granule                                                                                                                                | 6/38 | 91/19594  | 2.08E-08  | 7.79E- | 6.15E- | MCEMP1/CLEC5A/C                |   |
|    | 579     | membrane                                                                                                                                        |      |           |           | 07     | 07     | YBB/ITGAM/SLC2A3/<br>CD53      | 6 |
| CC | GO:0042 | specific granule                                                                                                                                | 7/38 | 160/19594 | 2.17E-08  | 7.79E- | 6.15E- | MCEMP1/CLEC5A/C                |   |
|    | 581     |                                                                                                                                                 |      |           |           | 07     | 07     | YBB/ITGAM/RETN/S<br>LC2A3/CD53 | 7 |
| CC | GO:0070 | tertiary granule                                                                                                                                | 6/38 | 164/19594 | 6.94E-07  | 1.87E- | 1.48E- | MCEMP1/CLEC5A/C                |   |
|    | 820     |                                                                                                                                                 |      |           |           | 05     | 05     | YBB/ITGAM/SLC2A3/<br>CD53      | 6 |
| CC | GO:0009 | external side of<br>plasma membrane                                                                                                             | 7/38 | 455/19594 | 2.35E-05  | 0.0005 | 0.0003 | CD86/TLR8/ITGAM/C              |   |
|    | 897     |                                                                                                                                                 |      |           |           | 02552  | 96751  | LEC10A/CD163/FCGR<br>2B/CCR1   | 7 |
| CC | GO:0030 | secretory granule<br>membrane                                                                                                                   | 6/38 | 312/19594 | 2.79E-05  | 0.0005 | 0.0003 | MCEMP1/CLEC5A/C                |   |
|    | 667     |                                                                                                                                                 |      |           |           | 02552  | 96751  | YBB/ITGAM/SLC2A3/<br>CD53      | 6 |
| CC | GO:0034 | secretory granule<br>lumen                                                                                                                      | 4/38 | 322/19594 | 0.0034021 | 0.0431 | 0.0340 | ALOX5/FN1/RETN/FG              |   |
|    | 774     |                                                                                                                                                 |      |           | 61        | 35046  | 53984  | R                              | 4 |
| CC | GO:0060 | cytoplasmic vesicle<br>lumen                                                                                                                    | 4/38 | 325/19594 | 0.0035167 | 0.0431 | 0.0340 | ALOX5/FN1/RETN/FG              |   |
|    | 205     |                                                                                                                                                 |      |           | 48        | 35046  | 53984  | R                              | 4 |
| CC | GO:0031 | vesicle lumen                                                                                                                                   | 4/38 | 327/19594 | 0.0035945 | 0.0431 | 0.0340 | ALOX5/FN1/RETN/FG              |   |
|    | 983     |                                                                                                                                                 |      |           | 87        | 35046  | 53984  | R                              | 4 |
| MF | GO:0001 | opsonin binding                                                                                                                                 | 2/38 | 16/18410  | 0.0004888 | 0.0209 | 0.0143 | ITGAM/VSIG4                    |   |
|    | 846     |                                                                                                                                                 |      |           | 29        | 3728   | 45069  |                                | 2 |
| MF | GO:0001 | virus receptor<br>activity                                                                                                                      | 3/38 | 76/18410  | 0.0005140 | 0.0209 | 0.0143 | MRC1/CLEC5A/CD86               |   |
|    | 618     |                                                                                                                                                 |      |           | 37        | 3728   | 45069  |                                | 3 |
| MF | GO:0140 | exogenous protein<br>binding                                                                                                                    | 3/38 | 77/18410  | 0.0005341 | 0.0209 | 0.0143 | MRC1/CLEC5A/CD86               |   |
|    | 272     |                                                                                                                                                 |      |           | 17        | 3728   | 45069  |                                | 3 |
| MF | GO:0038 | cargo receptor<br>activity                                                                                                                      | 3/38 | 79/18410  | 0.0005757 | 0.0209 | 0.0143 | MRC1/ITGAM/CD163               |   |
|    | 024     |                                                                                                                                                 |      |           | 69        | 3728   | 45069  |                                | 3 |
| MF | GO:0001 | amyloid-beta binding                                                                                                                            | 3/38 | 81/18410  | 0.0006194 | 0.0209 | 0.0143 | TREM2/ITGAM/FCGR               |   |
|    | 540     |                                                                                                                                                 |      |           | 46        | 3728   | 45069  | 2B                             | 3 |
| MF | GO:0001 | complement binding                                                                                                                              | 2/38 | 20/18410  | 0.0007699 | 0.0216 | 0.0148 | ITGAM/VSIG4                    |   |
|    | 848     |                                                                                                                                                 |      |           | 58        | 87143  | 58834  |                                | 2 |
| MF | GO:0016 | oxidoreductase<br>activity, acting on<br>single donors with<br>incorporation of<br>molecular oxygen,<br>incorporation of two<br>atoms of oxygen | 2/38 | 24/18410  | 0.0011126 | 0.0255 | 0.0174 | ALOX5/ALOX5AP                  |   |
|    | 702     |                                                                                                                                                 |      |           | 57        | 1557   | 81861  |                                | 2 |
| MF | GO:0016 | oxidoreductase<br>activity, acting on                                                                                                           | 2/38 | 25/18410  | 0.0012078 | 0.0255 | 0.0174 | ALOX5/ALOX5AP                  |   |
|    | 701     |                                                                                                                                                 |      |           | 38        | 1557   | 81861  |                                | 2 |

|    |         |                      |      |           |           |        |        |                  |   |
|----|---------|----------------------|------|-----------|-----------|--------|--------|------------------|---|
|    |         | single donors with   |      |           |           |        |        |                  |   |
|    |         | incorporation of     |      |           |           |        |        |                  |   |
|    |         | molecular oxygen     |      |           |           |        |        |                  |   |
| MF | GO:0003 | NAD+ nucleosidase    | 2/38 | 28/18410  | 0.0015159 | 0.0284 | 0.0195 | TLR8/PIK3AP1     | 2 |
|    | 953     | activity             |      |           | 48        | 66138  | 03427  |                  |   |
| MF | GO:0030 | carbohydrate binding | 4/38 | 270/18410 | 0.0022564 | 0.0381 | 0.0261 | MRC1/CLEC5A/CLEC | 4 |
|    | 246     |                      |      |           | 36        | 33775  | 27158  | 10A/SLC2A3       |   |
| MF | GO:0140 | immune receptor      | 3/38 | 148/18410 | 0.0034950 | 0.0536 | 0.0367 | FPR3/FCGR2B/CCR1 | 3 |
|    | 375     | activity             |      |           | 95        | 97374  | 90478  |                  |   |
| MF | GO:0015 | coreceptor activity  | 2/38 | 47/18410  | 0.0042296 | 0.0576 | 0.0394 | CD86/NRP1        | 2 |
|    | 026     |                      |      |           | 03        | 33976  | 8762   |                  |   |
| MF | GO:0005 | fatty acid binding   | 2/38 | 49/18410  | 0.0045893 | 0.0576 | 0.0394 | FABP6/ALOX5AP    | 2 |
|    | 504     |                      |      |           | 84        | 33976  | 8762   |                  |   |
|    |         | hydrolase activity,  |      |           |           |        |        |                  |   |
|    |         | hydrolyzing          |      |           |           |        |        |                  |   |
| MF | GO:0016 | N-glycosyl           | 2/38 | 50/18410  | 0.0047744 | 0.0576 | 0.0394 | TLR8/PIK3AP1     | 2 |
|    | 799     | compounds            |      |           | 12        | 33976  | 8762   |                  |   |

## Supplementary Table 2.KEGG enrichment analysis of 41 candidate genes.

| ID    | Description               | GeneRatio | BgRat<br>io | pvalue  | p.adjust | qvalue  | geneID               | Count |
|-------|---------------------------|-----------|-------------|---------|----------|---------|----------------------|-------|
| hsa04 | Phagosome                 | 6月28日     | 152/8       | 9.95E-0 | 0.00086  | 0.00072 | MRC1/CYBB/ITGAM/TUB  | 6     |
| 145   |                           |           | 190         | 6       | 5869     | 2867    | B6/ATP6V0D2/FCGR2B   |       |
| hsa05 | Tuberculosis              | 4月28日     | 180/8       | 0.00305 | 0.08992  | 0.07507 | MRC1/ITGAM/ATP6V0D2/ | 4     |
| 152   |                           |           | 190         | 8108    | 4986     | 3491    | FCGR2B               |       |
| hsa04 | Neutrophil extracellular  | 4月28日     | 190/8       | 0.00371 | 0.08992  | 0.07507 | CYBB/TLR8/ITGAM/FPR3 | 4     |
| 613   | trap formation            |           | 190         | 499     | 4986     | 3491    |                      |       |
| hsa05 | Staphylococcus aureus     | 3月28日     | 96/81       | 0.00413 | 0.08992  | 0.07507 | ITGAM/FPR3/FCGR2B    | 3     |
| 150   | infection                 |           | 90          | 4482    | 4986     | 3491    |                      |       |
| hsa04 | Ferroptosis               | 2月28日     | 41/81       | 0.00851 | 0.14482  | 0.12091 | FTL/CYBB             | 2     |
| 216   |                           |           | 90          | 232     | 9432     | 0234    |                      |       |
| hsa04 | Lysosome                  | 3月28日     | 132/8       | 0.00998 | 0.14482  | 0.12091 | LAPTM5/DNASE2B/ATP6  | 3     |
| 142   |                           |           | 190         | 8237    | 9432     | 0234    | V0D2                 |       |
| hsa04 | Necroptosis               | 3月28日     | 159/8       | 0.01648 | 0.20485  | 0.17101 | FTL/CYBB/MLKL        | 3     |
| 217   |                           |           | 190         | 2274    | 1126     | 9089    |                      |       |
| hsa05 | Acute myeloid leukemia    | 2月28日     | 67/81       | 0.02173 | 0.21599  | 0.18032 | ITGAM/BCL2A1         | 2     |
| 221   |                           |           | 90          | 2762    | 6693     | 3918    |                      |       |
| hsa04 | Fc epsilon RI signaling   | 2月28日     | 68/81       | 0.02234 | 0.21599  | 0.18032 | ALOX5/ALOX5AP        | 2     |
| 664   | pathway                   |           | 90          | 4485    | 6693     | 3918    |                      |       |
| hsa05 | Transcriptional           | 3月28日     | 193/8       | 0.02738 | 0.22276  | 0.18597 | CD86/ITGAM/BCL2A1    | 3     |
| 202   | misregulation in cancer   |           | 190         | 3717    | 1174     | 1216    |                      |       |
| hsa05 | Leishmaniasis             | 2月28日     | 77/81       | 0.02816 | 0.22276  | 0.18597 | CYBB/ITGAM           | 2     |
| 140   |                           |           | 90          | 5206    | 1174     | 1216    |                      |       |
| hsa04 | B cell receptor signaling | 2月28日     | 82/81       | 0.03163 | 0.22935  | 0.19147 | PIK3AP1/FCGR2B       | 2     |

|       |                       |       |       |         |         |         |                |   |
|-------|-----------------------|-------|-------|---------|---------|---------|----------------|---|
| 662   | pathway               |       | 90    | 5174    | 5013    | 6055    |                |   |
| hsa04 | Complement and        | 2月28日 | 86/81 | 0.03452 | 0.23106 | 0.19290 | ITGAM/VSIG4    | 2 |
| 610   | coagulation cascades  |       | 90    | 7258    | 7034    | 5328    |                |   |
| hsa05 | Rheumatoid arthritis  | 2月28日 | 93/81 | 0.03982 | 0.23554 | 0.19664 | CD86/ATP6V0D2  | 2 |
| 323   |                       |       | 90    | 6821    | 6779    | 5224    |                |   |
| hsa05 | Coronavirus disease - | 3月28日 | 232/8 | 0.04366 | 0.23554 | 0.19664 | CYBB/TLR8/NRP1 | 3 |
| 171   | COVID-19              |       | 190   | 7813    | 6779    | 5224    |                |   |
| hsa04 | AGE-RAGE signaling    |       | 100/8 | 0.04541 | 0.23554 | 0.19664 |                |   |
| 933   | pathway in diabetic   | 2月28日 | 190   | 6004    | 6779    | 5224    | CYBB/FN1       | 2 |
|       | complications         |       |       |         |         |         |                |   |
| hsa05 | Amoebiasis            | 2月28日 | 102/8 | 0.04706 | 0.23554 | 0.19664 | ITGAM/FN1      | 2 |
| 146   |                       |       | 190   | 3907    | 6779    | 5224    |                |   |
| hsa04 | Toll-like receptor    |       | 104/8 | 0.04873 | 0.23554 | 0.19664 |                |   |
| 620   | signaling pathway     | 2月28日 | 190   | 3816    | 6779    | 5224    | CD86/TLR8      | 2 |

### Supplementary Table 3. Protein Interaction Networks of 41 Candidate Genes.

| from    | to     | weight |
|---------|--------|--------|
| SLC2A3  | CD53   | 902    |
| BCL2A1  | LAPTM5 | 428    |
| IGSF6   | LAPTM5 | 526    |
| CD53    | LAPTM5 | 910    |
| CLEC10A | CCR1   | 424    |
| BCL2A1  | CCR1   | 431    |
| CD53    | CCR1   | 551    |
| LAPTM5  | CCR1   | 402    |
| RETN    | TLR8   | 490    |
| CLEC10A | TLR8   | 744    |
| BCL2A1  | TLR8   | 451    |
| IGSF6   | TLR8   | 555    |
| CCR1    | TLR8   | 590    |
| MLKL    | TLR8   | 449    |
| SLC2A3  | MCEMP1 | 912    |
| RETN    | MCEMP1 | 628    |
| CD53    | MCEMP1 | 918    |
| LAPTM5  | MCEMP1 | 471    |
| TLR8    | MCEMP1 | 438    |
| CLEC10A | CD86   | 587    |
| NRP1    | CD86   | 489    |
| BCL2A1  | CD86   | 464    |
| CD53    | CD86   | 571    |
| LAPTM5  | CD86   | 403    |
| CCR1    | CD86   | 702    |
| TLR8    | CD86   | 786    |

|         |        |     |
|---------|--------|-----|
| CLEC10A | FPR3   | 445 |
| CCR1    | FPR3   | 932 |
| TLR8    | FPR3   | 532 |
| NRP1    | FN1    | 533 |
| CCR1    | FN1    | 415 |
| TLR8    | FN1    | 483 |
| CD86    | FN1    | 429 |
| CLEC10A | FCGR2B | 430 |
| IGSF6   | FCGR2B | 435 |
| CD53    | FCGR2B | 505 |
| LAPTM5  | FCGR2B | 524 |
| CCR1    | FCGR2B | 496 |
| TLR8    | FCGR2B | 615 |
| CD86    | FCGR2B | 829 |
| CLEC10A | CD163  | 535 |
| IGSF6   | CD163  | 552 |
| CCR1    | CD163  | 456 |
| TLR8    | CD163  | 594 |
| CD86    | CD163  | 740 |
| FPR3    | CD163  | 547 |
| FCGR2B  | CD163  | 674 |
| CD53    | CD101  | 731 |
| TLR8    | TREM2  | 462 |
| CD86    | TREM2  | 449 |
| FCGR2B  | TREM2  | 424 |
| CD163   | TREM2  | 419 |
| IGSF6   | FGR    | 571 |
| CD53    | FGR    | 527 |
| LAPTM5  | FGR    | 575 |
| CCR1    | FGR    | 441 |
| TLR8    | FGR    | 638 |
| CD86    | FGR    | 400 |
| FN1     | FGR    | 531 |
| FCGR2B  | FGR    | 436 |
| TLR8    | ALOX5  | 450 |
| CD86    | ALOX5  | 406 |
| FGR     | ALOX5  | 615 |
| CLEC10A | VSIG4  | 437 |
| IGSF6   | VSIG4  | 499 |
| TLR8    | VSIG4  | 448 |
| CD86    | VSIG4  | 470 |
| FPR3    | VSIG4  | 555 |
| CD163   | VSIG4  | 870 |
| TREM2   | VSIG4  | 586 |

|         |        |     |
|---------|--------|-----|
| RETN    | FTL    | 902 |
| SLC2A3  | CYBB   | 904 |
| BCL2A1  | CYBB   | 444 |
| IGSF6   | CYBB   | 415 |
| CD53    | CYBB   | 955 |
| LAPTM5  | CYBB   | 529 |
| CCR1    | CYBB   | 546 |
| TLR8    | CYBB   | 703 |
| MCEMP1  | CYBB   | 928 |
| CD86    | CYBB   | 641 |
| FPR3    | CYBB   | 471 |
| FN1     | CYBB   | 468 |
| FCGR2B  | CYBB   | 493 |
| FGR     | CYBB   | 461 |
| ALOX5   | CYBB   | 460 |
| SLC2A3  | ITGAM  | 906 |
| RETN    | ITGAM  | 498 |
| CLEC10A | ITGAM  | 624 |
| CD53    | ITGAM  | 952 |
| LAPTM5  | ITGAM  | 536 |
| CCR1    | ITGAM  | 748 |
| TLR8    | ITGAM  | 769 |
| MCEMP1  | ITGAM  | 932 |
| CD86    | ITGAM  | 920 |
| FN1     | ITGAM  | 589 |
| FCGR2B  | ITGAM  | 895 |
| CD163   | ITGAM  | 759 |
| TREM2   | ITGAM  | 569 |
| FGR     | ITGAM  | 664 |
| ALOX5   | ITGAM  | 681 |
| VSIG4   | ITGAM  | 540 |
| CYBB    | ITGAM  | 977 |
| SLC2A3  | CLEC5A | 900 |
| CD53    | CLEC5A | 926 |
| TLR8    | CLEC5A | 589 |
| MCEMP1  | CLEC5A | 935 |
| CD86    | CLEC5A | 401 |
| TREM2   | CLEC5A | 647 |
| VSIG4   | CLEC5A | 447 |
| CYBB    | CLEC5A | 932 |
| ITGAM   | CLEC5A | 947 |
| RETN    | MRC1   | 501 |
| CLEC10A | MRC1   | 531 |
| CCR1    | MRC1   | 425 |

|        |         |     |
|--------|---------|-----|
| TLR8   | MRC1    | 583 |
| CD86   | MRC1    | 814 |
| FCGR2B | MRC1    | 725 |
| CD163  | MRC1    | 900 |
| TREM2  | MRC1    | 590 |
| VSIG4  | MRC1    | 501 |
| CYBB   | MRC1    | 424 |
| ITGAM  | MRC1    | 832 |
| CLEC5A | MRC1    | 474 |
| FN1    | MMP12   | 570 |
| TREM2  | MMP12   | 410 |
| ITGAM  | MMP12   | 443 |
| MRC1   | MMP12   | 422 |
| IGSF6  | ALOX5AP | 616 |
| CD53   | ALOX5AP | 632 |
| LAPTM5 | ALOX5AP | 728 |
| CCR1   | ALOX5AP | 409 |
| FGR    | ALOX5AP | 564 |
| ALOX5  | ALOX5AP | 997 |
| ITGAM  | ALOX5AP | 658 |
